# Supplementary material for: Holotranscobalamin (HoloTC, Active-B12) and Herbert’s model for the development of vitamin B12 deficiency: a review and alternative hypothesis
Source: PubMed Central journal article supplement (PMC4899389; doi:10.1186/s40064-016-2252-z), 2016-05-20

HoloTC

NORMAL

- STAGE 1

- STAGE 2

- STAGE 3

- STAGE 4

Negative  
B12  
Balance

B12  
Depletion

B12  
Deficient  
Erythro-  
poiesis

B12  
Deficiency  
Anaemia

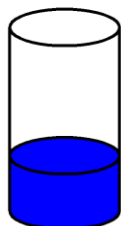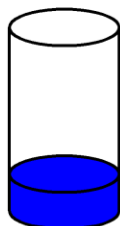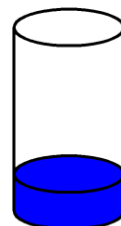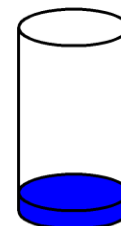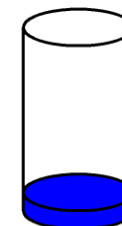

> 30 pg/mL  
(22 pmol/L)

Grey Zone

< 20 pg/mL  
(15 pmol/L)

< 12 pg/mL  
(9 pmol/L)

Liver B12

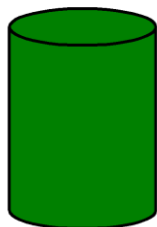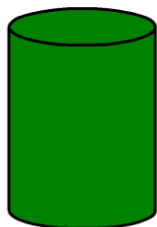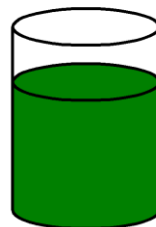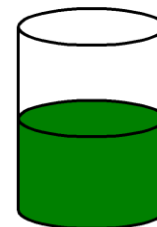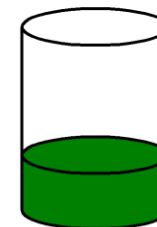

RBC & WBC B12

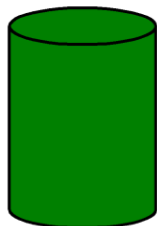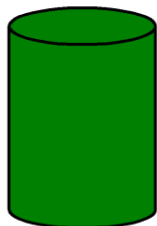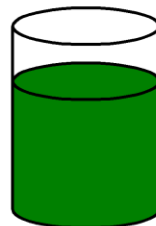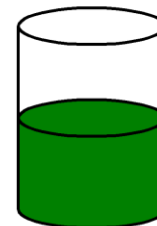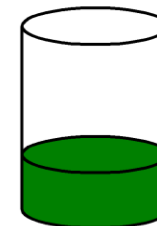

MMA

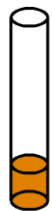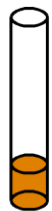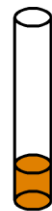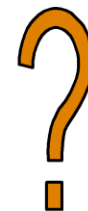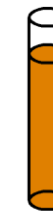

HoloTC

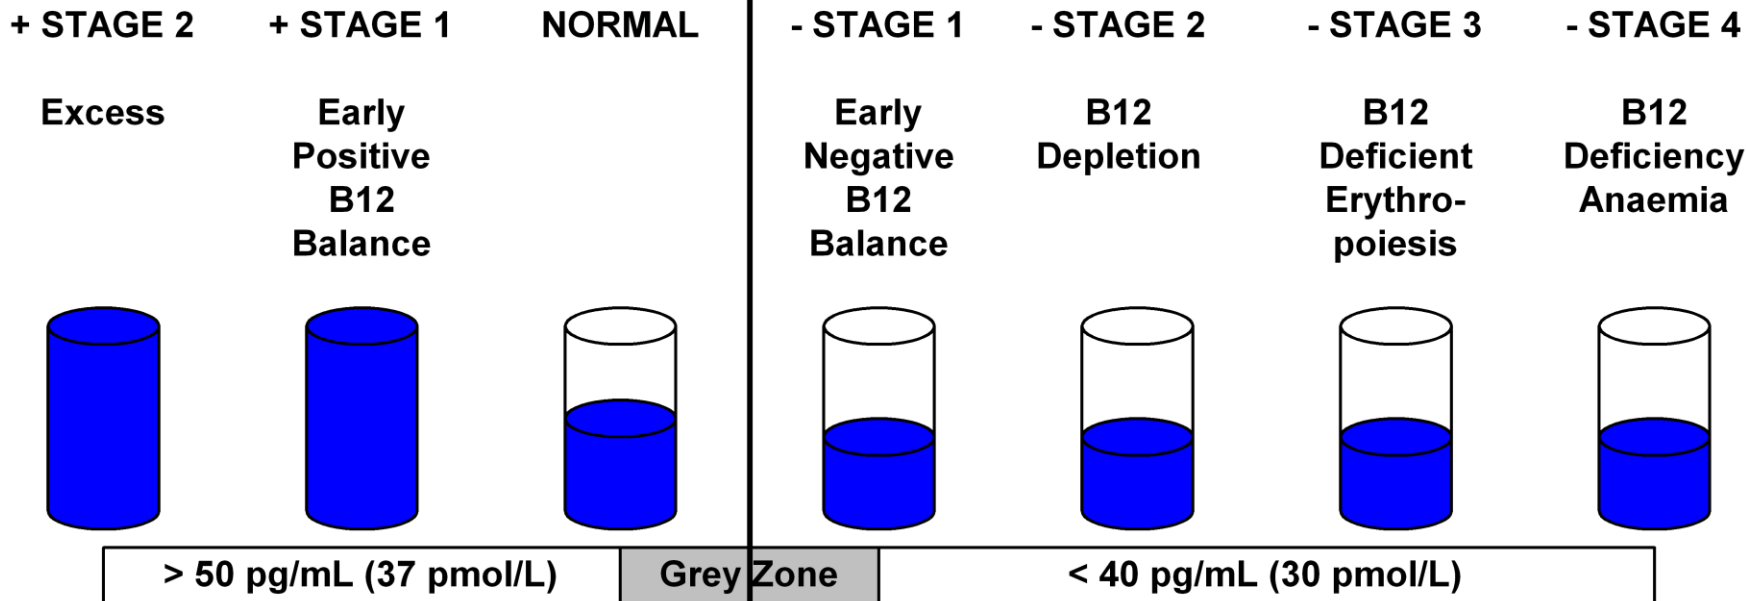

Liver B12

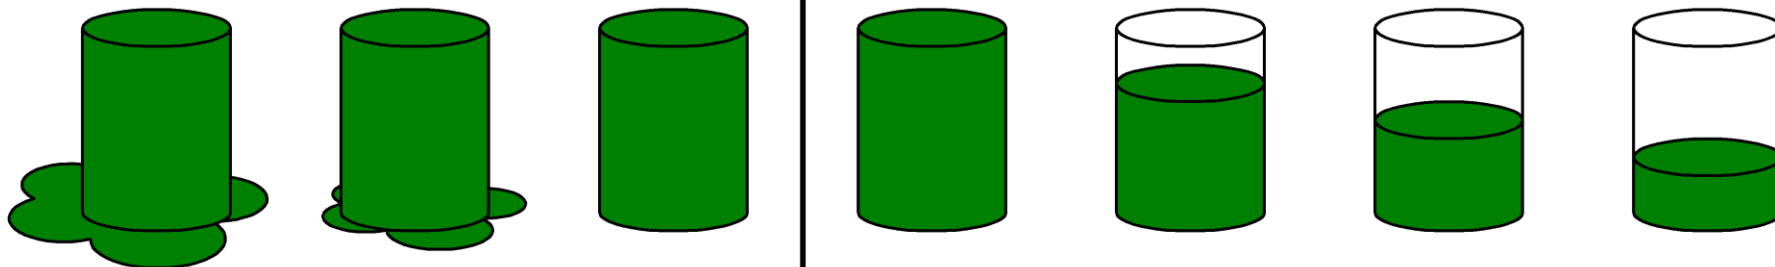

RBC & WBC B12

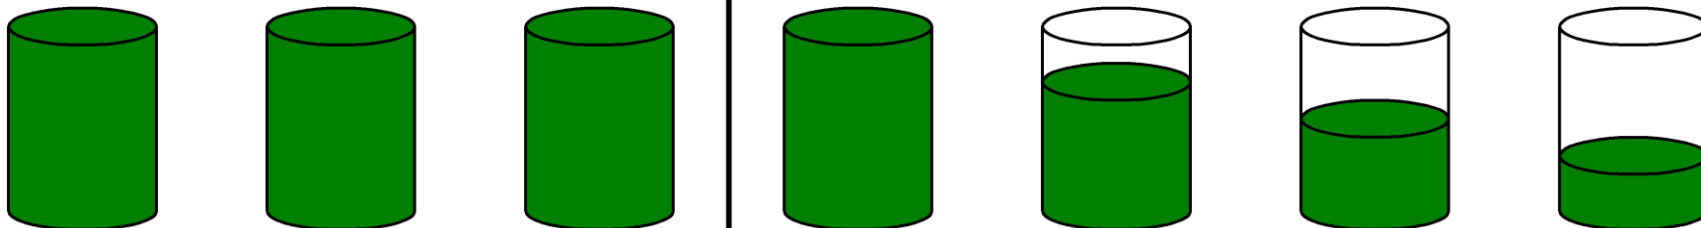

MMA and tHcy

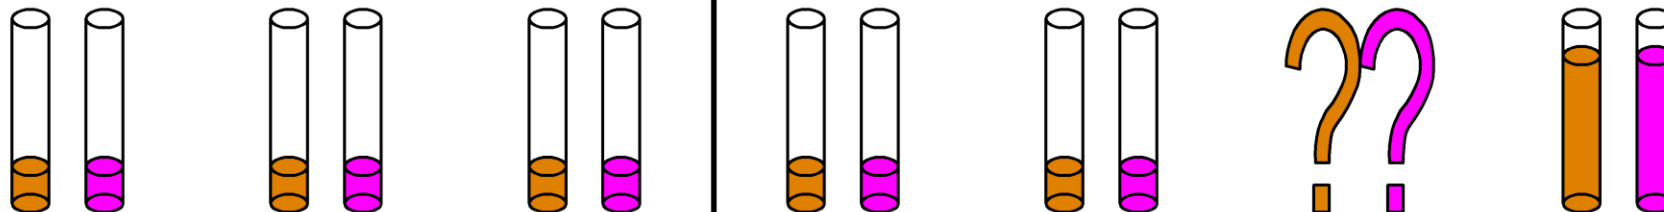

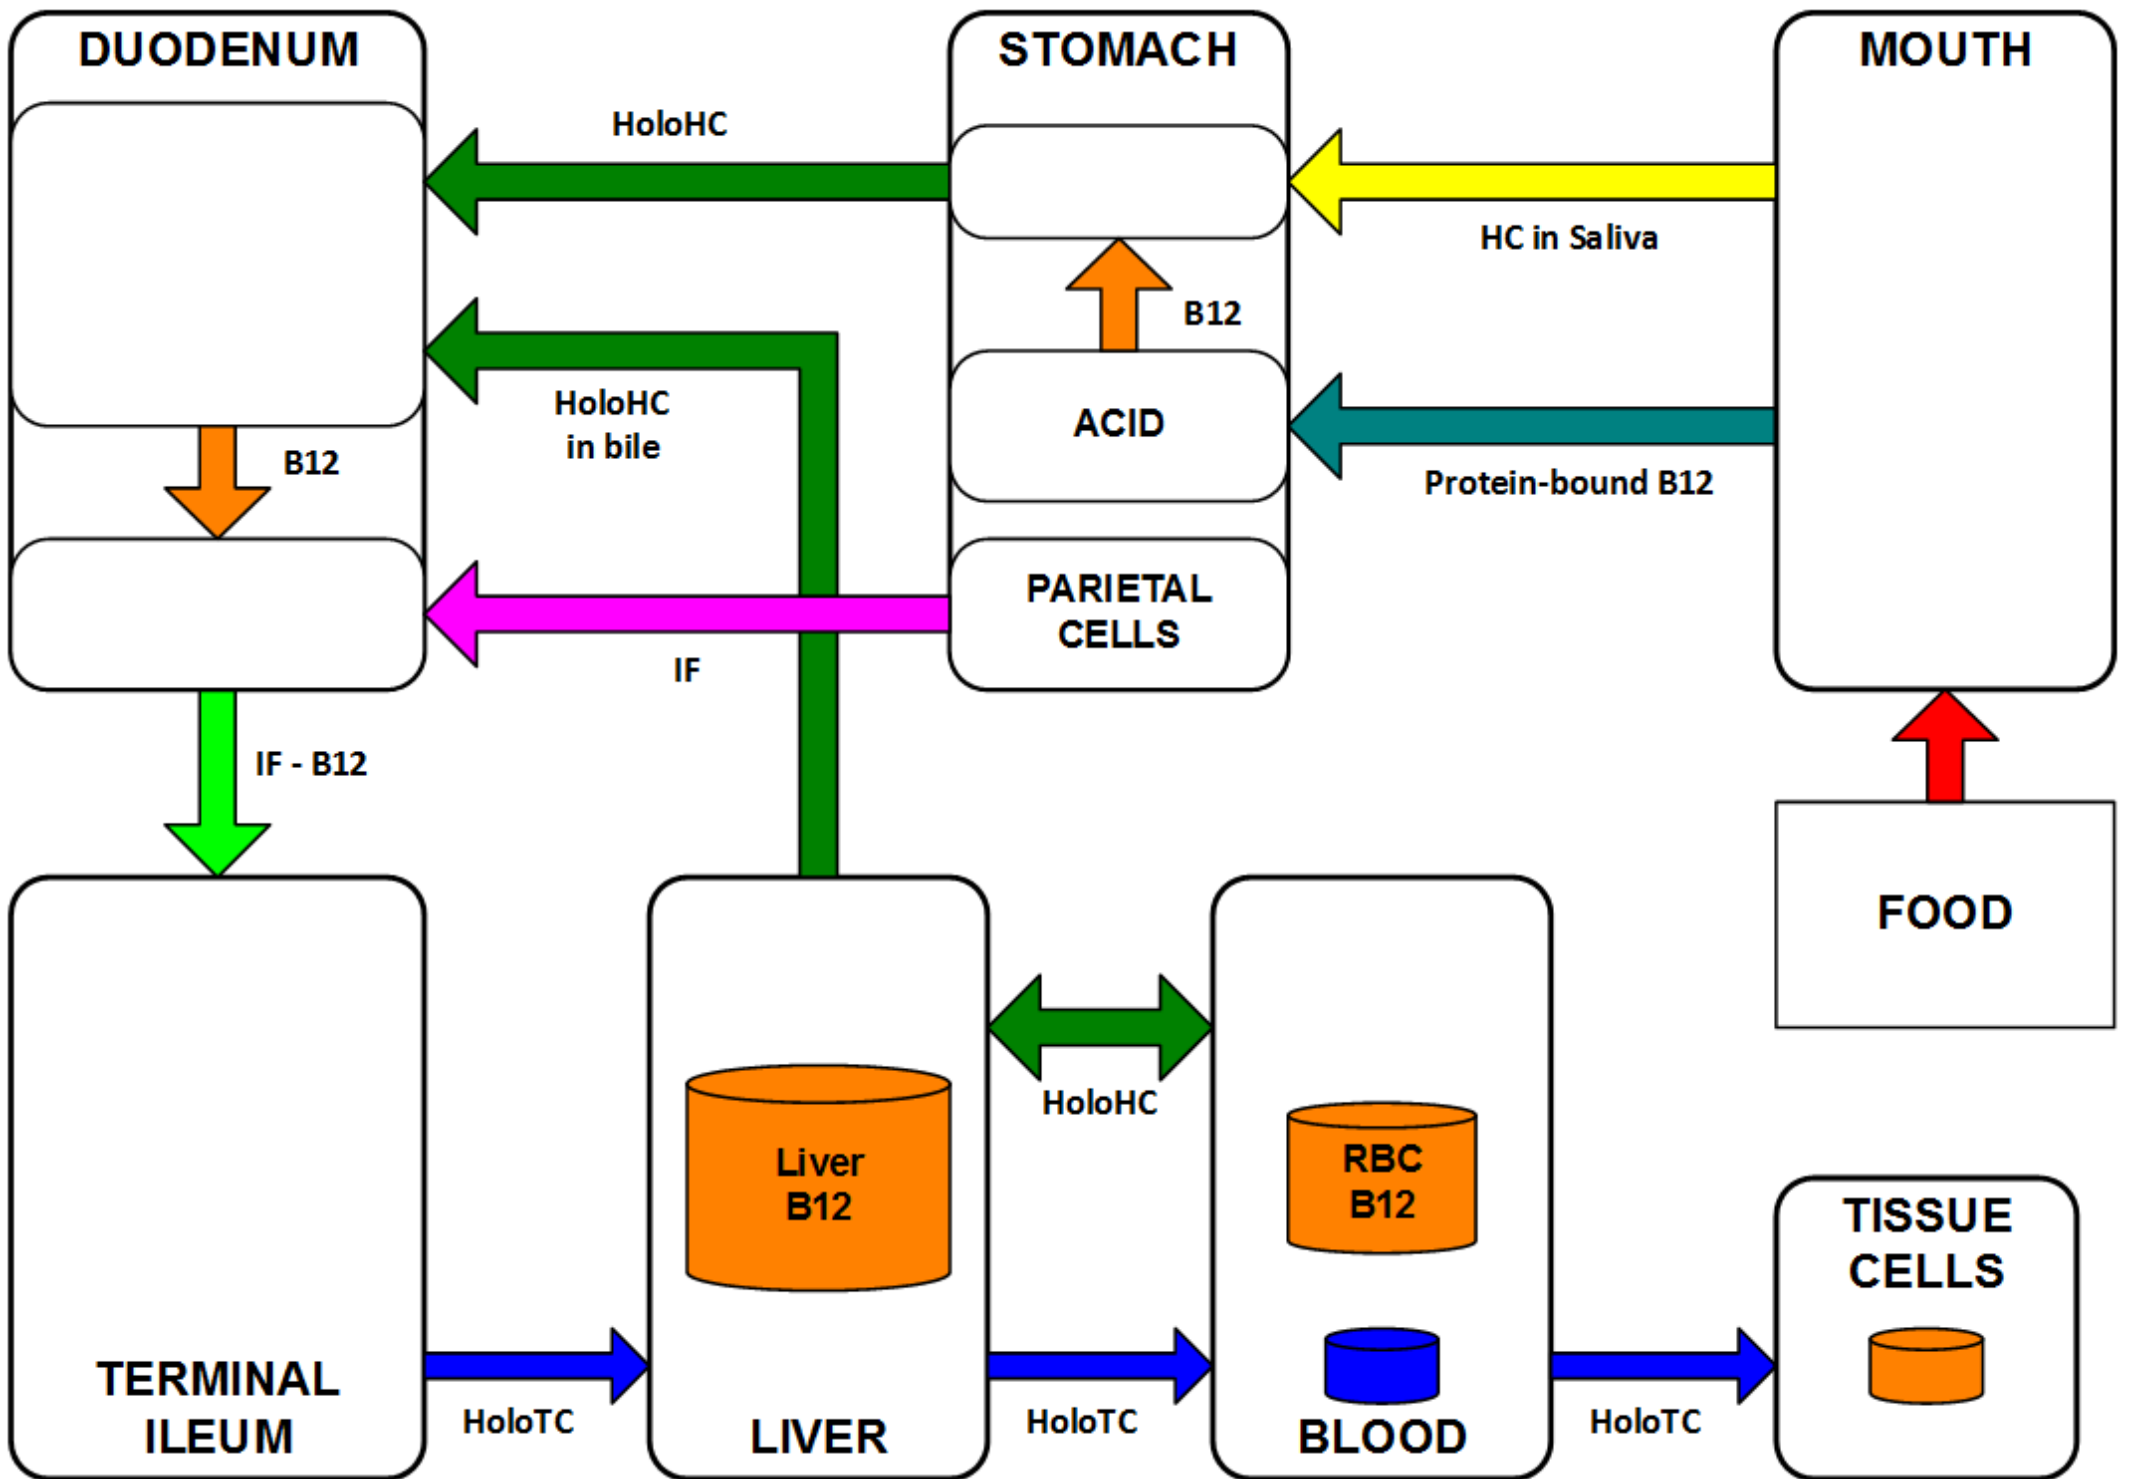

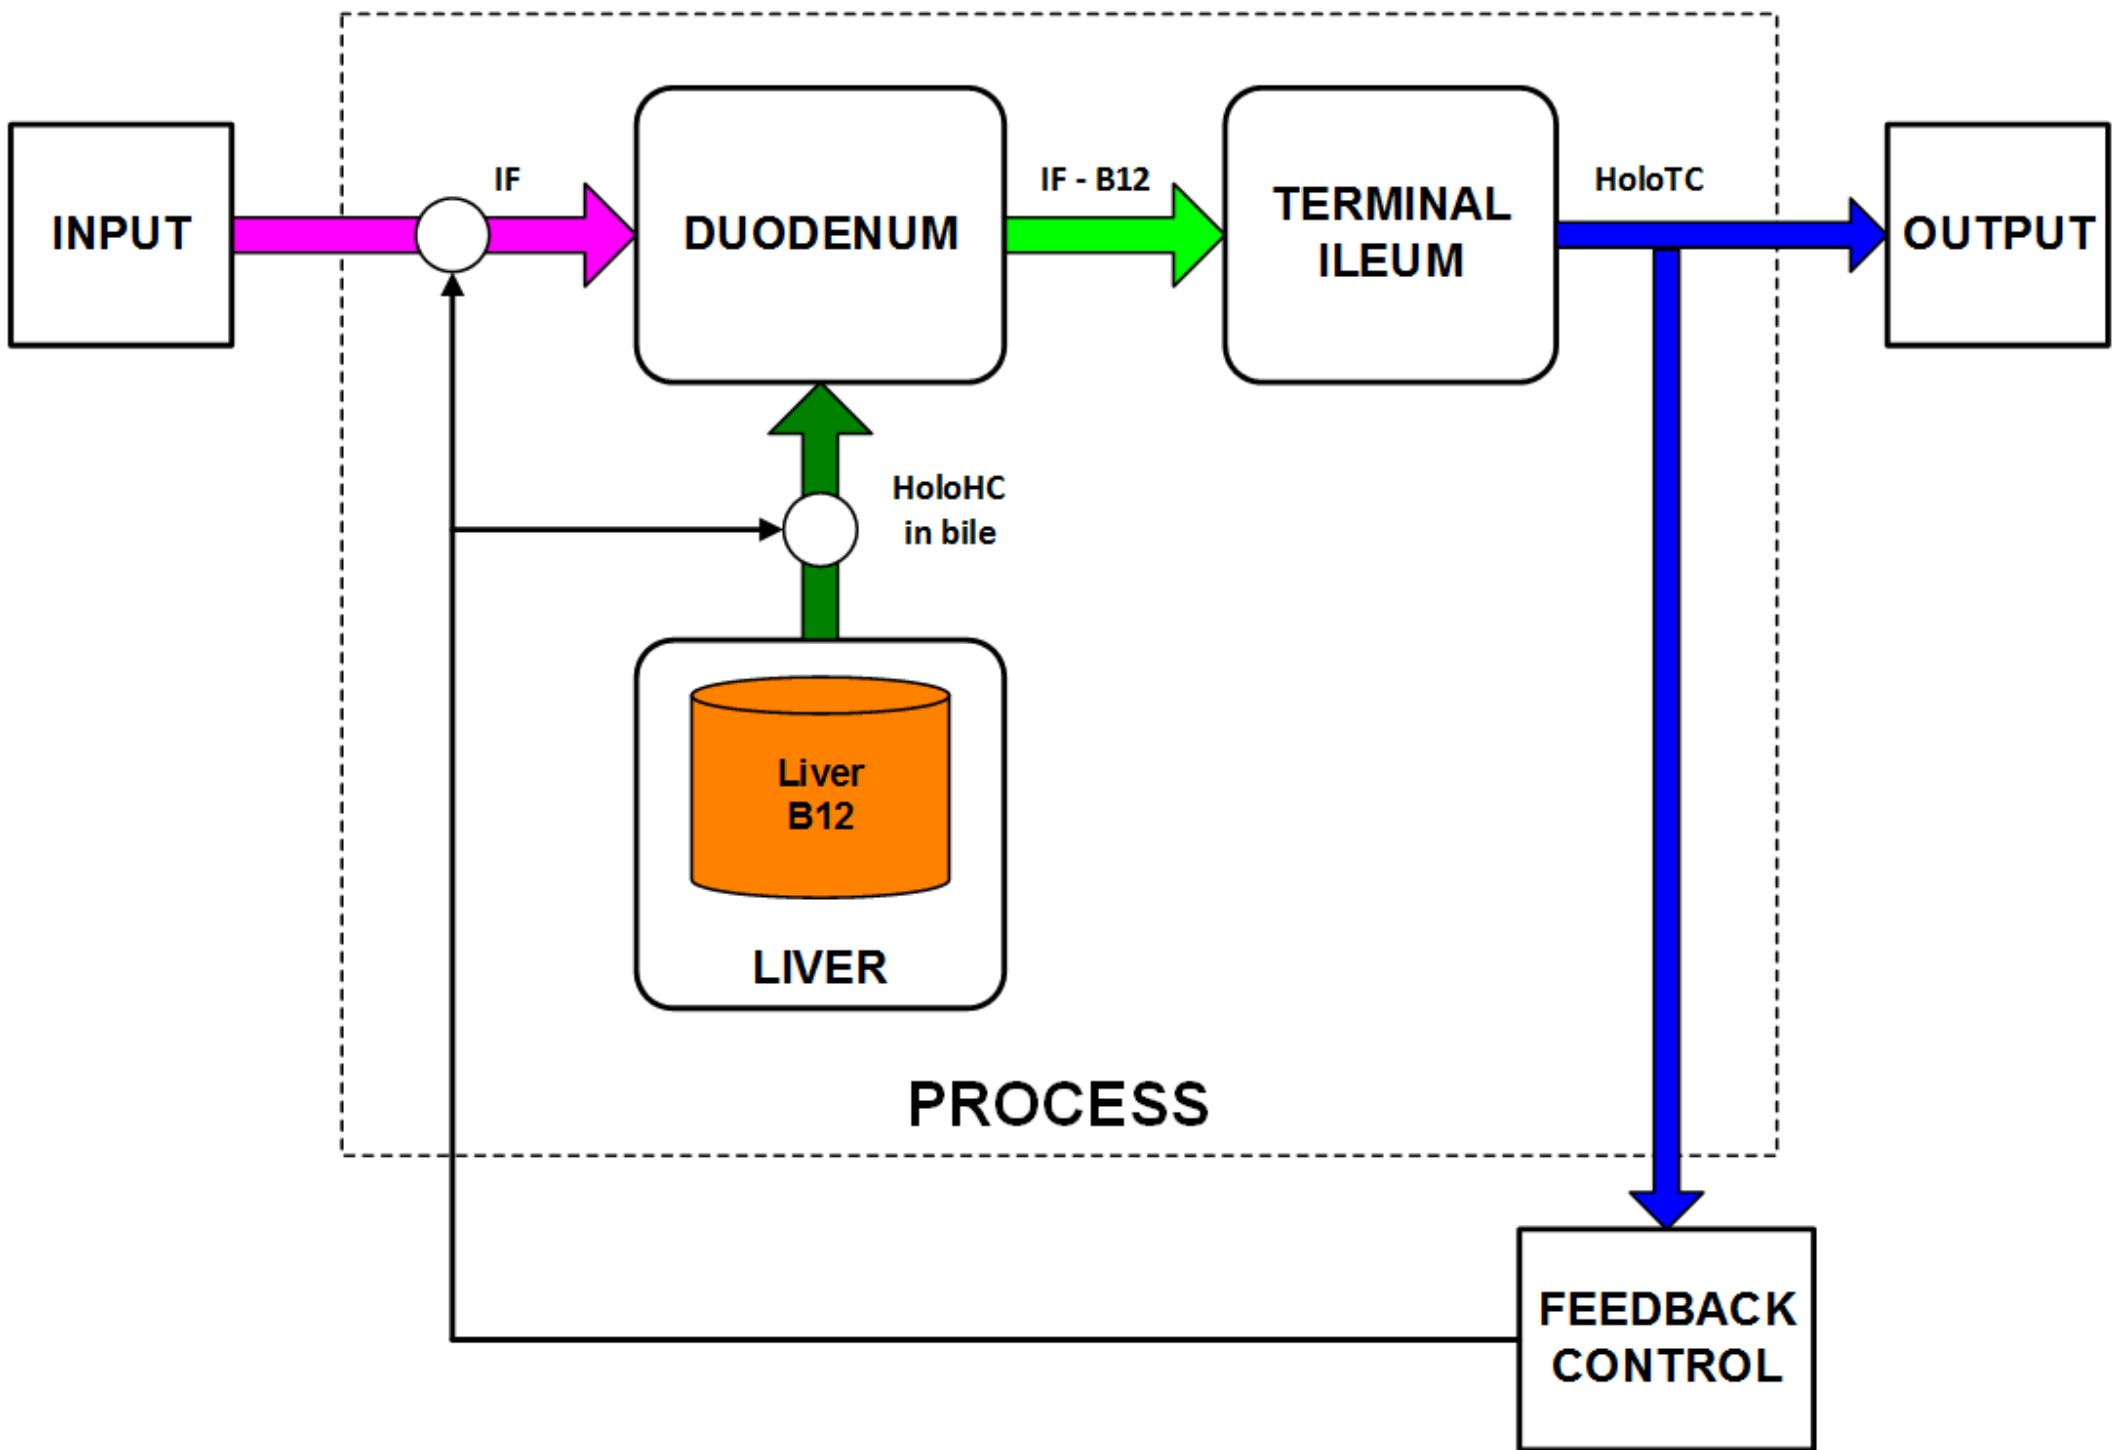

**NORMAL**

**DEPLETION**

**METABOLIC DEFICIENCY**

**Total B12**

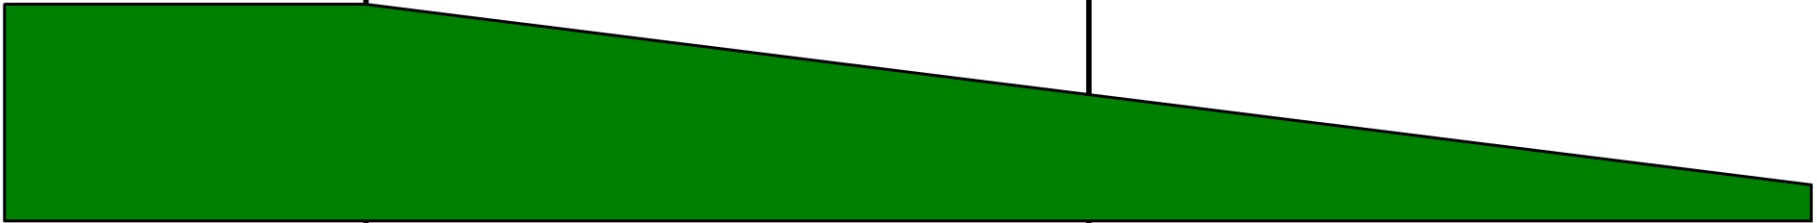

**HoloTC**

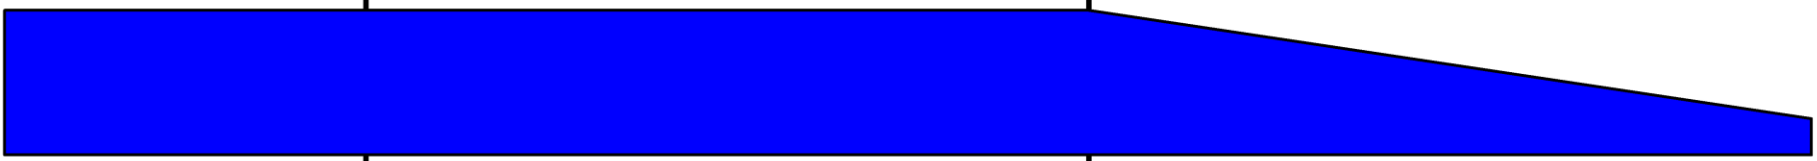

**MMA**

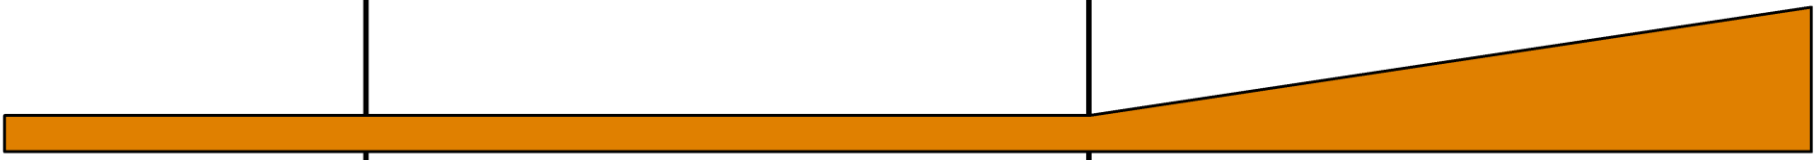

**tHcy**

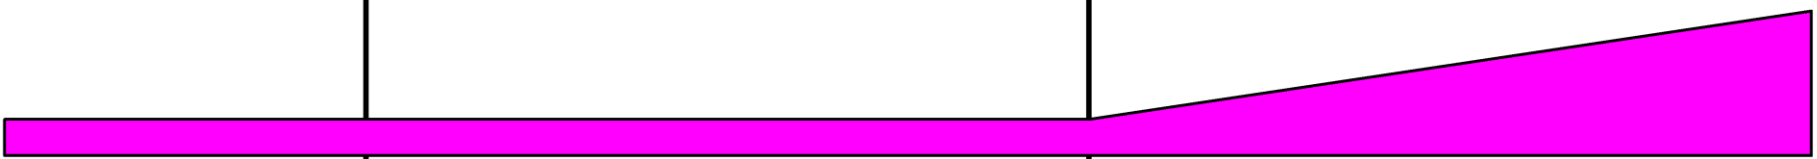

**NORMAL**

**METABOLIC DEFICIENCY**

**Total B12**

**HoloTC**

**MMA**

**tHcy**

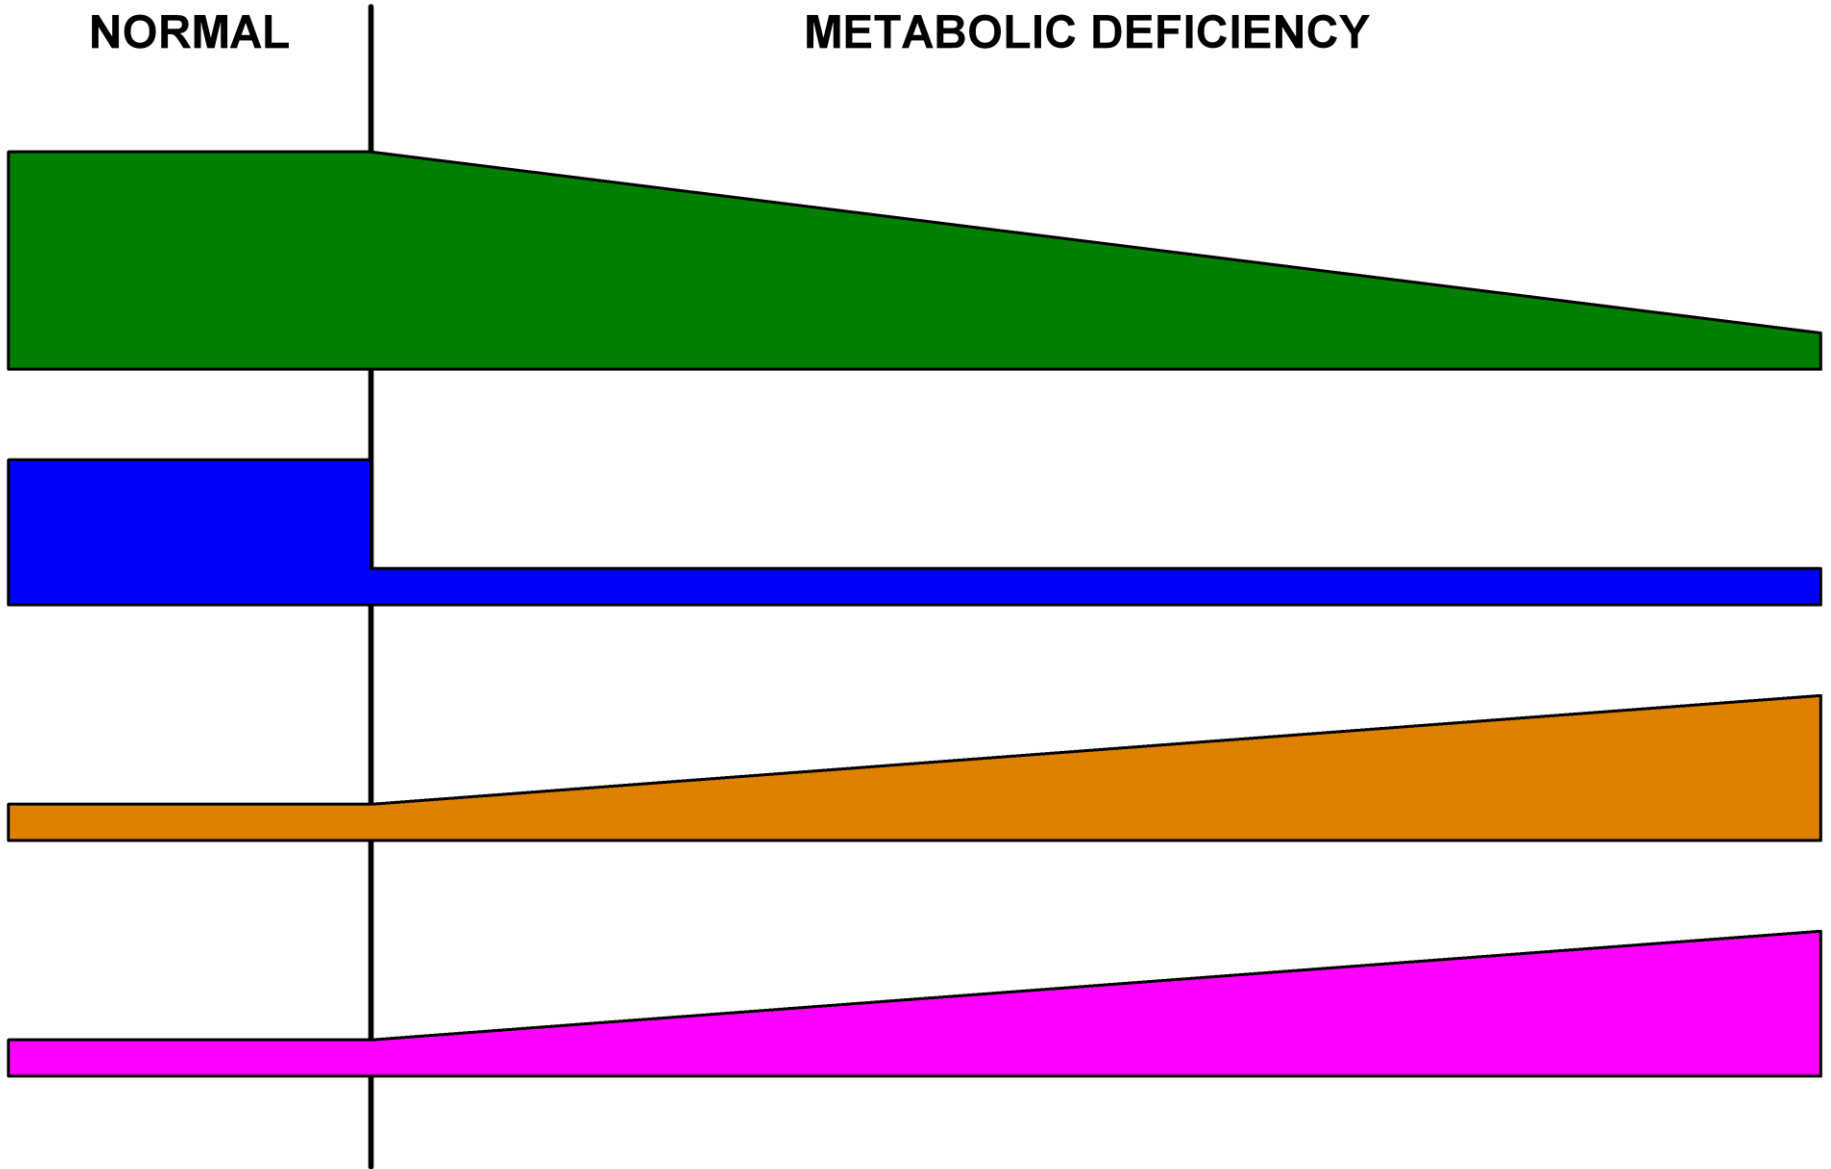

**NORMAL**

**METABOLIC DEFICIENCY**

**Total B12**

**HoloTC**

**MMA**

**tHcy**

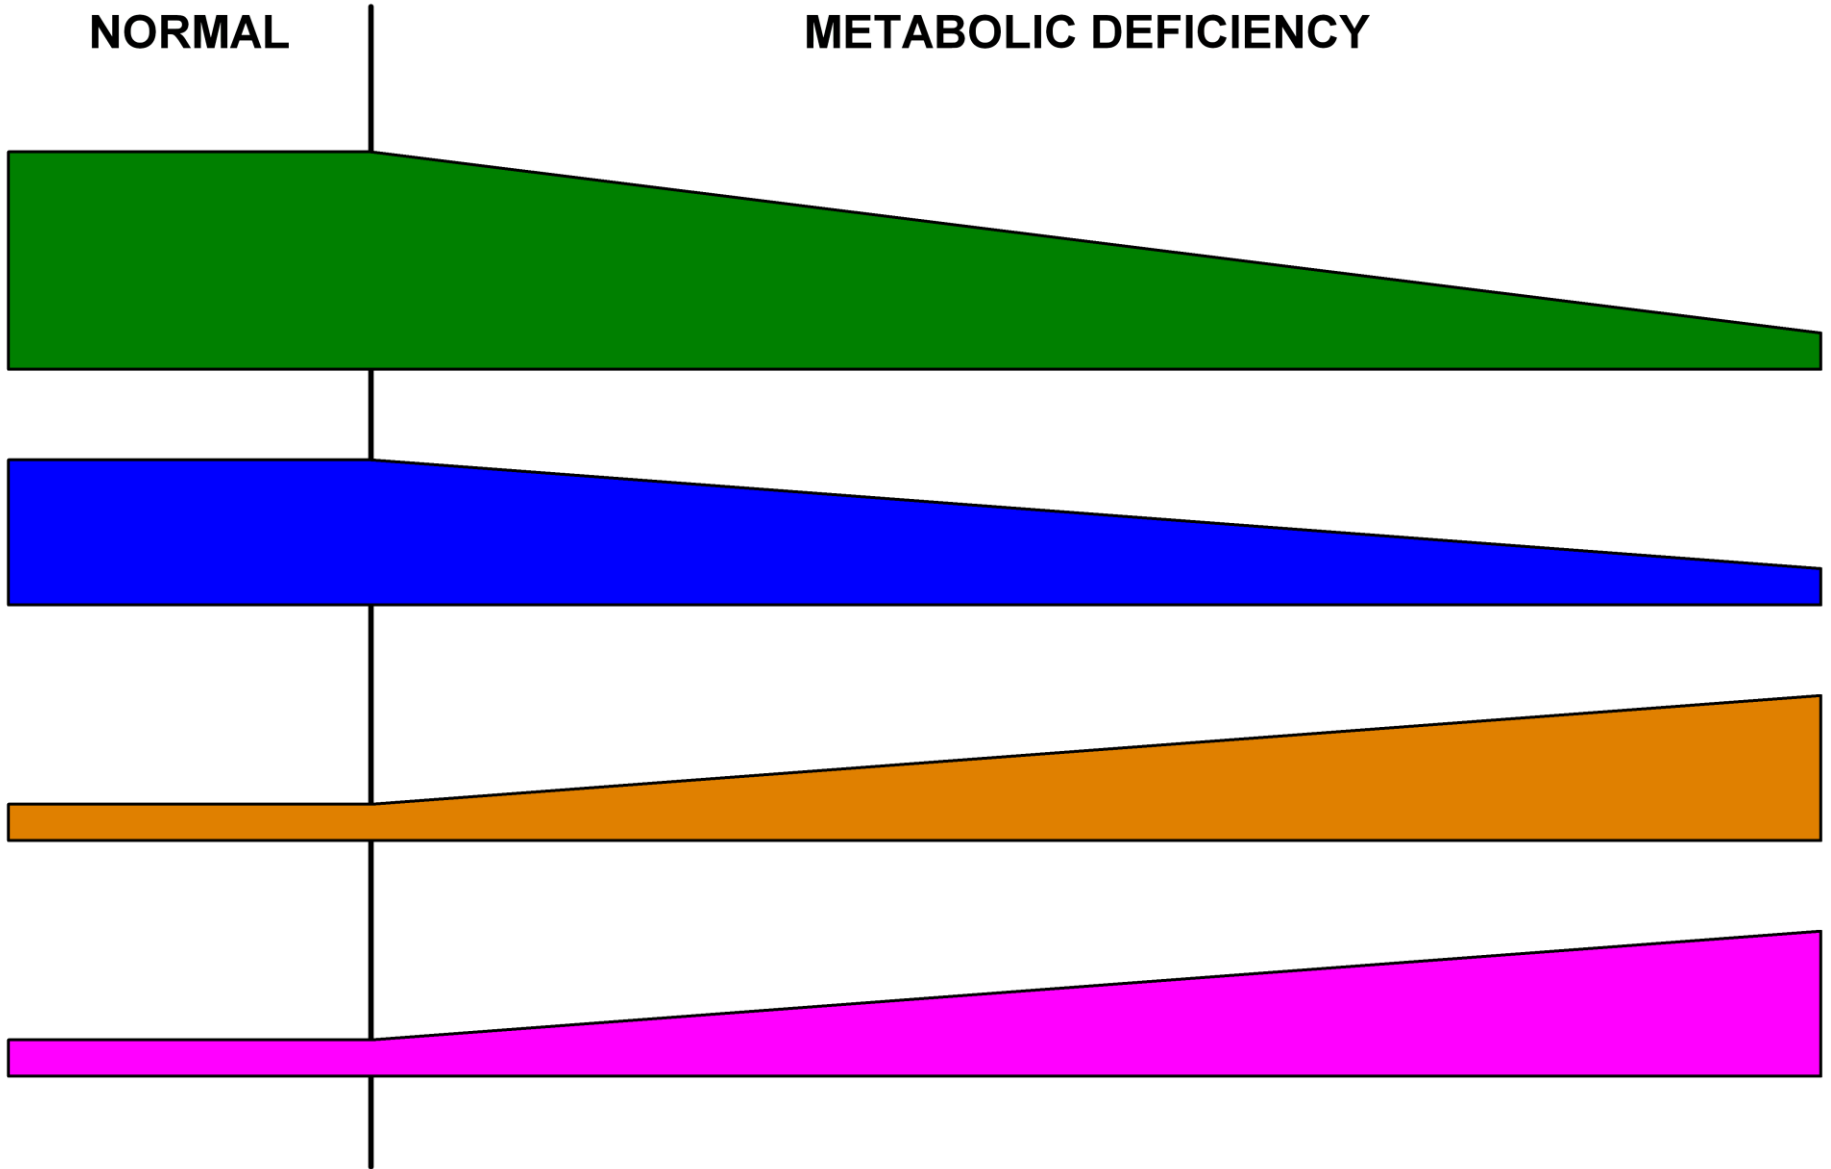

Supplement: 40064_2016_2252_MOESM1_ESM.pdf [file 40064_2016_2252_MOESM1_ESM.pdf]
